# Supplementary material for: Mixed-methods feasibility cluster randomised controlled trial of a paramedic-administered breathlessness management intervention for acute-on-chronic breathlessness (BREATHE): study findings
Source: PubMed Central journal article supplement — ERJ Open Res. 2022 Nov 21;8(4):00257-2022. doi: 10.1183/23120541.00257-2022 (PMC9677245; doi:10.1183/23120541.00257-2022), 2022-11-21
Supplement: 00257-2022.BREATHEInterviewTopicGuideFollow-upPatientandCarer.pdf [file 00257-2022.BREATHEInterviewTopicGuideFollow-upPatientandCarer.pdf]

## **Semi-structured interview (patient and carer if present)**

- Introduction to researcher and project
- Information sheets for both patient and carer-any Qs?
- Consent forms to sign

### **1 Please tell me about your recent ambulance visit:**

- Invite carer's perspective

### **2 From your recent ambulance visit can you suggest how they could improve the care of breathless people?**

- Invite carer's perspective

### **3 What do you think of the information leaflet the ambulance staff left with you? (For those who received the intervention)**

- Which parts have you used?
- Have you decided to seek any help because of what you read in the leaflet?
- Invite carer's perspective

### **Thank you, now let's think about your health in the future a little**

### **4 What do you think you will do the next time you feel very breathless like when you called the ambulance last week?**

- Use the BREATHE card? (For those who received the intervention)
- Remember anything the paramedics did with them/described to them?
- Invite carer's perspective

### **5 How do you see the next few weeks/months going?**

- Plans to seek help/start new management?
- Invite carer's perspective

**6 And finally is there anything else about your experience you'd like to share with me?**

- Invite carer's perspective

**Thank you for taking part!**

- Thank you for helping us understand more about your situation and how to improve the services offered
- Remember we have told your GP you have been in a study (if consent given) and if you are upset/need advice/need to talk more, then your GP/specialist nurse will be able to discuss your health further...
