# Supplementary material for: Mixed-methods feasibility cluster randomised controlled trial of a paramedic-administered breathlessness management intervention for acute-on-chronic breathlessness (BREATHE): study findings
Source: PubMed Central journal article supplement — ERJ Open Res. 2022 Nov 21;8(4):00257-2022. doi: 10.1183/23120541.00257-2022 (PMC9677245; doi:10.1183/23120541.00257-2022), 2022-11-21
Supplement: 00257-2022.BREATHEInterviewTopicGuideParamedic.pdf [file 00257-2022.BREATHEInterviewTopicGuideParamedic.pdf]

## **Semi-structured interview/focus group with paramedics**

### **Call-outs to patients with chronic breathlessness**

- 1 Can you tell me how you find call-outs to patients with acute-on-chronic breathlessness?**
- 2 How did you find delivering the BREATHE intervention? *(For those who were randomised to the intervention arm.)***

### **Thinking about deciding to convey or not**

- 3 Can you tell me how you feel about making decisions whether or not to convey breathless patients?**

### **Performing the BREATHE trial**

- 4 How did you find the trial processes?**

### **Finishing off**

- 5 Is there anything else from your field notes that you'd like to tell me about this intervention or the trial in general?**

### **Thank you for taking part!**

- Thank you for helping us understand more about your experiences
- Payment form
